# Supplementary material for: AdipoRon, adiponectin receptor agonist, improves vascular function in the mesenteric arteries of type 2 diabetic mice
Source: PubMed Central journal article supplement (PMC7077821; doi:10.1371/journal.pone.0230227), 2020-03-17

Adipon - Original  
western  
blot for

Fig. 3A

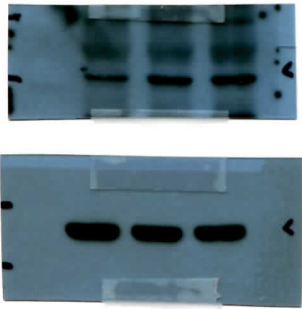

Fig. 3B

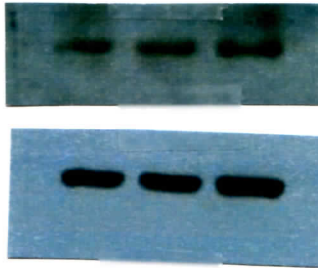

Fig. 3C

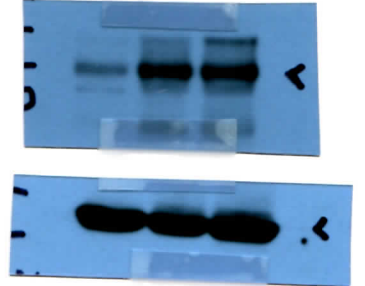

Fig. 3D

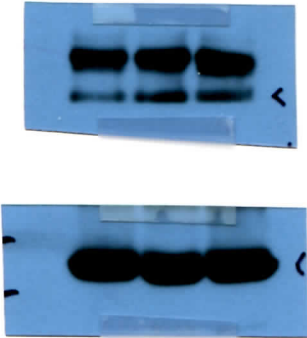

Fig. 4A

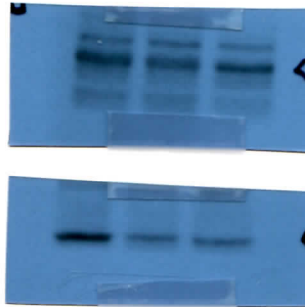

Fig. 4B

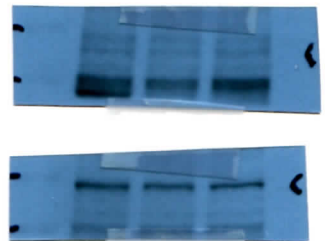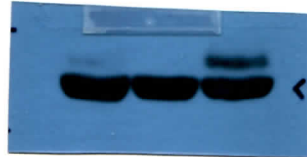

Fig. 5A

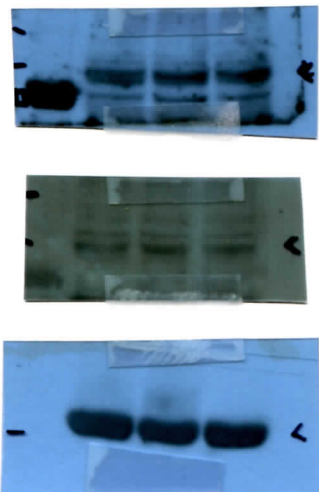

Fig. 5B

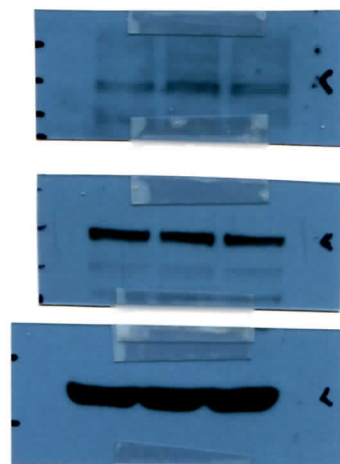

Supplement: pone.0230227.s001.pdf [file pone.0230227.s001.pdf]
